# Supplementary material for: Prebiotic Activity of Vaginal Lactobacilli on Bifidobacteria: from Concept to Formulation
Source: PubMed Central journal article supplement (PMC9927276; doi:10.1128/spectrum.02009-22), 2023-01-05
Supplement: spectrum.02009-22-s0001.pdf [file spectrum.02009-22-s0001.pdf]

## Supplementary methods

### <sup>1</sup>HNM analysis of BC17-CFSs

BC17-CFSs (350  $\mu$ L) were added to 350  $\mu$ L of bi-distilled water and to 200  $\mu$ L of a D<sub>2</sub>O solution of 3-(trimethylsilyl)-propionic-2,2,3,3-d<sub>4</sub> acid sodium salt (TSP) 10 mM as a chemical-shift reference ( $\delta$  -0.017). A pH of  $7.00 \pm 0.02$  was granted by a 1 M phosphate buffer, while microbial proliferation was prevented by 10  $\mu$ L of NaN<sub>3</sub> 2 mM. After centrifugation ( $18,630 \times g$  for 10 min at 4°C), an AVANCE III spectrometer (Bruker, Milan, Italy) was used to register <sup>1</sup>H-NMR spectra at a frequency of 600.13 MHz and 298 K. Broad signals from slowly tumbling molecules were reduced with a T2 filter of 400 echoes, separated by an echo time of 400  $\mu$ s. Chenomx software (Chenomx Inc., Canada, version 8.3) was employed to perform the assignment of signals to compounds, by comparison with Chenomx's (version 10) and HMDB's (release 2) databases. TSP was employed as an internal standard for the absolute quantification of molecules. The concentration of each molecule was calculated from the area of one of its signals, measured by global spectra deconvolution, implemented in MestReNova software (Mestrelab research S.L. Santiago De Compostela (Spain), version 14.2.0-26256), by considering a limit of quantification (LOQ) of 5. This was done after applying a line broadening of 0.3 and a baseline adjustment by Whittaker Smoother procedure. Concentrations of metabolites were expressed as differences with respect to MRS medium.

**FIG S1** Correlation graphic between the two datasets (batch A and batch B) obtained testing lactobacilli CFSs towards planktonic cultures of bifidobacteria/*E. coli* SO107 (n = number of independent experiments) (Pearson  $r = 0.9779$ ,  $R^2=0.9564$ ).

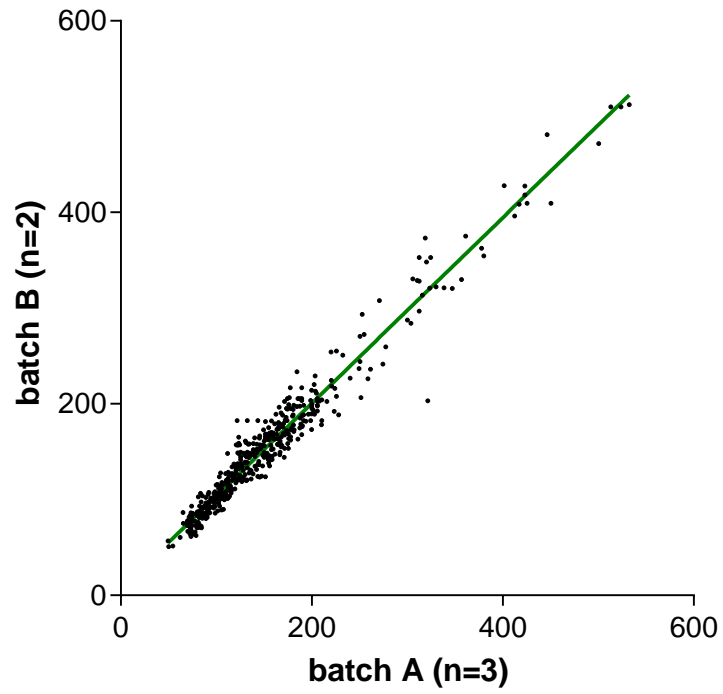

**FIG S2** Effects of *Enterococcus/Staphylococcus* CFSs on bifidobacteria/*E. coli* SO107 growth. The growth of bifidobacteria/*E. coli* SO107 in the presence of CFSs is reported in percentage with respect to control (100%) ( $n = 3$  from one batch of CFSs). Results obtained with CFSs recovered after 7 h, 13 h and 24 h of fermentation are reported in the first, second and third row of each strain, respectively.

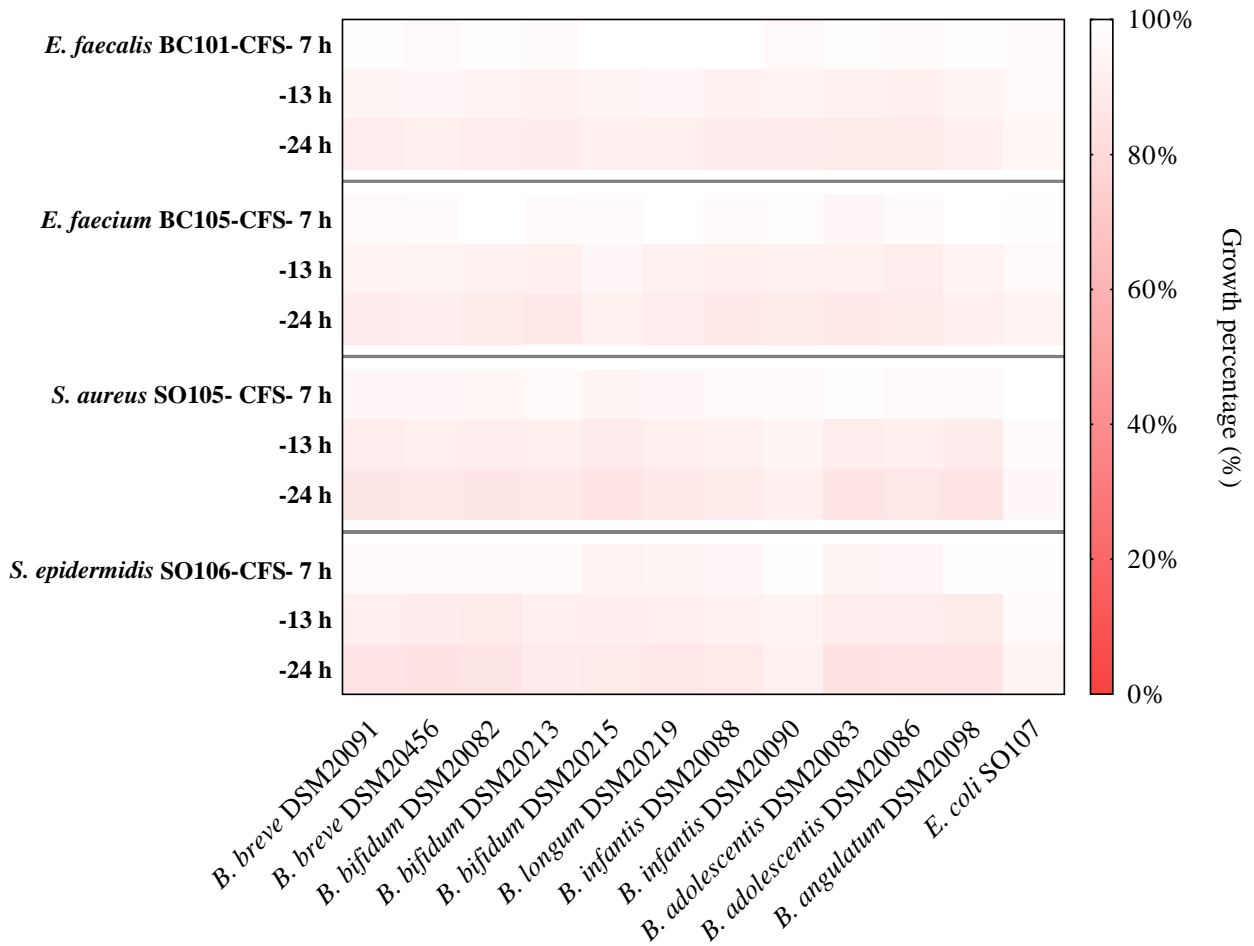

**FIG S3** Effects of BC17-CFS-hydrogel on bifidobacteria tested immediately after preparation (t=0) and after 30 days of storage (t=30 days). Results are expressed in percentages in terms of (a) stimulation of planktonic growth and (b) stimulation of biofilms' formation (100%) (mean  $\pm$  SD,  $n = 4$ ). Statistical differences are calculated with respect to control (100%), \*  $p < 0.05$ . Statistical differences between t=0 and t=30 days are also reported, ns: not significant.

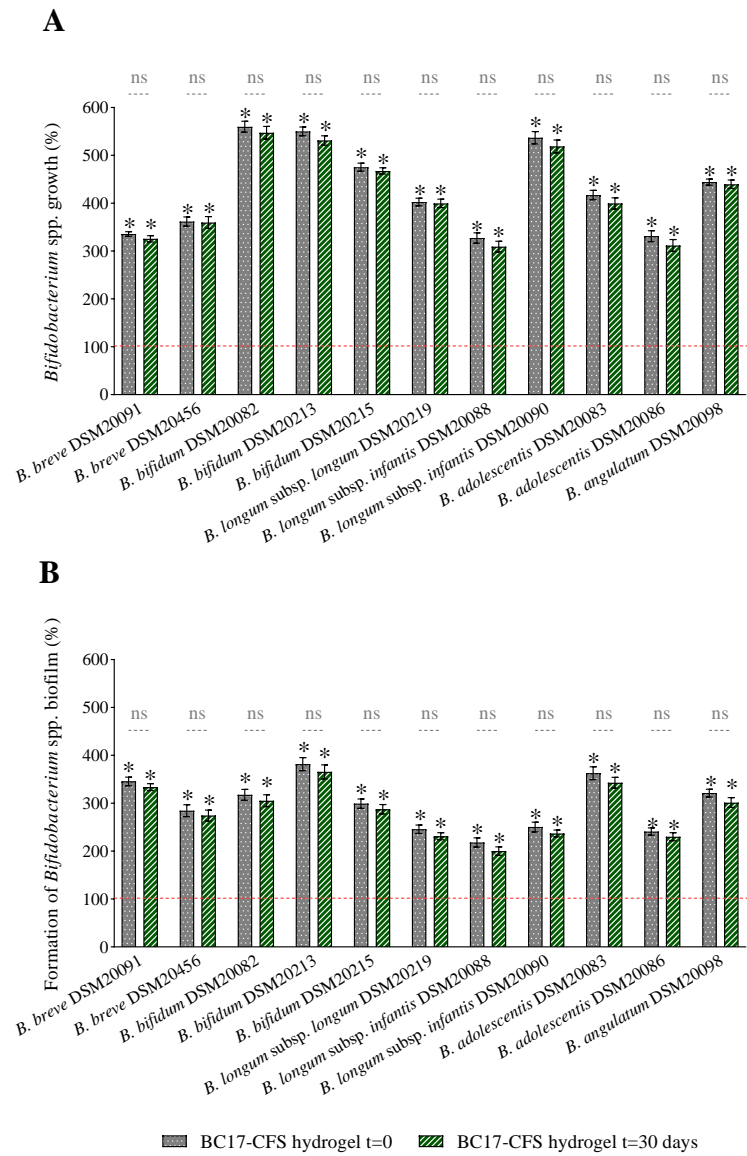

**Table S1** Effects of lactobacilli CFSs on *Bifidobacterium* spp. growth. The growth of bifidobacteria/*E. coli* SO107 in the presence of lactobacilli CFSs is reported in percentage with respect to control (100%) as mean  $\pm$  SD of data acquired from two batches of CFSs ( $n = 5$ ).

|                                  | <i>B. breve</i><br>DSM20091 | <i>B. breve</i><br>DSM20456 | <i>B. bifidum</i><br>DSM20082 | <i>B. bifidum</i><br>DSM20213 |
|----------------------------------|-----------------------------|-----------------------------|-------------------------------|-------------------------------|
| <i>L. crispatus</i> BC1-CFS -7 h | 149.24 $\pm$ 4.11           | 126.31 $\pm$ 20.65          | 178.30 $\pm$ 9.19             | 174.03 $\pm$ 8.04             |
| -13 h                            | 119.30 $\pm$ 2.52           | 122.55 $\pm$ 5.77           | 140.95 $\pm$ 6.23             | 146.59 $\pm$ 7.69             |
| -24 h                            | 81.30 $\pm$ 4.21            | 84.11 $\pm$ 3.40            | 91.90 $\pm$ 3.34              | 83.06 $\pm$ 4.80              |
| <i>L. crispatus</i> BC3-CFS -7 h | 142.29 $\pm$ 5.51           | 145.33 $\pm$ 7.51           | 177.04 $\pm$ 8.38             | 177.46 $\pm$ 7.02             |
| -13 h                            | 118.28 $\pm$ 4.47           | 120.60 $\pm$ 6.12           | 147.85 $\pm$ 5.85             | 147.91 $\pm$ 7.94             |
| -24 h                            | 76.64 $\pm$ 2.90            | 75.19 $\pm$ 3.39            | 93.70 $\pm$ 3.59              | 78.68 $\pm$ 7.46              |
| <i>L. crispatus</i> BC4-CFS -7 h | 141.21 $\pm$ 6.59           | 142.60 $\pm$ 5.92           | 183.68 $\pm$ 7.51             | 176.98 $\pm$ 7.27             |
| -13 h                            | 117.92 $\pm$ 4.75           | 120.85 $\pm$ 5.91           | 145.18 $\pm$ 6.07             | 138.13 $\pm$ 6.00             |
| -24 h                            | 70.98 $\pm$ 6.14            | 73.26 $\pm$ 3.22            | 96.48 $\pm$ 3.55              | 71.98 $\pm$ 3.20              |
| <i>L. crispatus</i> BC5-CFS -7 h | 137.83 $\pm$ 7.65           | 147.48 $\pm$ 6.83           | 176.50 $\pm$ 8.39             | 169.61 $\pm$ 6.35             |
| -13 h                            | 119.30 $\pm$ 7.11           | 120.04 $\pm$ 6.29           | 156.38 $\pm$ 8.55             | 152.49 $\pm$ 6.66             |
| -24 h                            | 90.44 $\pm$ 5.25            | 91.17 $\pm$ 3.40            | 93.68 $\pm$ 4.40              | 88.10 $\pm$ 3.91              |
| <i>L. crispatus</i> BC6-CFS -7 h | 142.57 $\pm$ 5.61           | 152.57 $\pm$ 6.21           | 182.78 $\pm$ 7.53             | 175.55 $\pm$ 7.28             |
| -13 h                            | 101.48 $\pm$ 4.06           | 103.62 $\pm$ 4.40           | 157.40 $\pm$ 8.71             | 149.81 $\pm$ 5.79             |
| -24 h                            | 83.62 $\pm$ 4.03            | 87.16 $\pm$ 4.29            | 106.90 $\pm$ 7.51             | 89.94 $\pm$ 12.25             |
| <i>L. crispatus</i> BC7-CFS -7 h | 140.06 $\pm$ 7.26           | 141.83 $\pm$ 7.38           | 181.86 $\pm$ 7.87             | 188.49 $\pm$ 17.93            |
| -13 h                            | 99.34 $\pm$ 6.86            | 107.66 $\pm$ 4.95           | 158.10 $\pm$ 7.53             | 149.51 $\pm$ 5.78             |
| -24 h                            | 76.11 $\pm$ 5.77            | 83.82 $\pm$ 4.40            | 99.68 $\pm$ 3.60              | 74.19 $\pm$ 3.04              |
| <i>L. gasseri</i> BC8-CFS -7 h   | 167.32 $\pm$ 7.77           | 170.41 $\pm$ 8.54           | 200.62 $\pm$ 7.28             | 193.48 $\pm$ 8.55             |
| -13 h                            | 124.54 $\pm$ 5.11           | 132.99 $\pm$ 11.41          | 170.84 $\pm$ 7.41             | 170.77 $\pm$ 9.75             |
| -24 h                            | 102.48 $\pm$ 3.90           | 108.98 $\pm$ 5.96           | 123.74 $\pm$ 4.71             | 102.32 $\pm$ 6.69             |
| <i>L. gasseri</i> BC9-CFS -7 h   | 154.54 $\pm$ 8.20           | 163.45 $\pm$ 17.47          | 207.28 $\pm$ 8.04             | 197.34 $\pm$ 10.70            |
| -13 h                            | 123.56 $\pm$ 5.44           | 131.52 $\pm$ 7.24           | 163.65 $\pm$ 9.15             | 162.77 $\pm$ 9.43             |
| -24 h                            | 99.90 $\pm$ 5.09            | 107.78 $\pm$ 6.80           | 108.40 $\pm$ 4.61             | 100.56 $\pm$ 4.90             |
| <i>L. gasseri</i> BC10-CFS -7 h  | 156.97 $\pm$ 7.58           | 159.73 $\pm$ 7.92           | 207.48 $\pm$ 8.87             | 198.12 $\pm$ 8.16             |
| -13 h                            | 128.85 $\pm$ 7.21           | 125.74 $\pm$ 5.11           | 158.57 $\pm$ 12.14            | 164.23 $\pm$ 6.37             |
| -24 h                            | 103.47 $\pm$ 4.42           | 110.70 $\pm$ 6.12           | 106.70 $\pm$ 5.56             | 103.46 $\pm$ 4.00             |
| <i>L. gasseri</i> BC11-CFS -7 h  | 171.36 $\pm$ 10.21          | 164.33 $\pm$ 11.50          | 261.87 $\pm$ 13.32            | 233.41 $\pm$ 26.33            |
| -13 h                            | 133.78 $\pm$ 6.88           | 137.19 $\pm$ 8.18           | 184.34 $\pm$ 9.97             | 184.66 $\pm$ 8.88             |
| -24 h                            | 124.27 $\pm$ 6.79           | 128.46 $\pm$ 9.49           | 131.73 $\pm$ 6.92             | 120.18 $\pm$ 5.93             |
| <i>L. gasseri</i> BC12-CFS -7 h  | 158.19 $\pm$ 6.81           | 169.45 $\pm$ 9.16           | 205.44 $\pm$ 10.89            | 198.22 $\pm$ 8.82             |
| -13 h                            | 122.65 $\pm$ 4.65           | 130.27 $\pm$ 8.12           | 169.87 $\pm$ 6.65             | 172.21 $\pm$ 7.33             |
| -24 h                            | 101.26 $\pm$ 4.98           | 104.28 $\pm$ 4.03           | 108.82 $\pm$ 4.17             | 101.64 $\pm$ 4.40             |
| <i>L. gasseri</i> BC13-CFS -7 h  | 168.54 $\pm$ 7.65           | 172.94 $\pm$ 9.25           | 205.64 $\pm$ 7.64             | 210.82 $\pm$ 19.09            |
| -13 h                            | 127.41 $\pm$ 8.43           | 123.65 $\pm$ 4.93           | 172.61 $\pm$ 8.07             | 159.61 $\pm$ 12.43            |
| -24 h                            | 106.94 $\pm$ 9.62           | 102.50 $\pm$ 4.05           | 103.46 $\pm$ 4.78             | 101.04 $\pm$ 4.00             |
| <i>L. gasseri</i> BC14-CFS -7 h  | 167.10 $\pm$ 7.17           | 161.76 $\pm$ 6.97           | 177.51 $\pm$ 7.97             | 185.13 $\pm$ 14.46            |
| -13 h                            | 131.68 $\pm$ 6.17           | 134.04 $\pm$ 5.90           | 165.25 $\pm$ 6.63             | 162.09 $\pm$ 6.26             |
| -24 h                            | 105.85 $\pm$ 5.95           | 110.97 $\pm$ 4.08           | 100.48 $\pm$ 3.72             | 105.32 $\pm$ 4.28             |

|                                   |                                       |                                      |                                        |                                        |
|-----------------------------------|---------------------------------------|--------------------------------------|----------------------------------------|----------------------------------------|
| <i>L. vaginalis</i> BC16-CFS -7 h | 219.92 ± 8.46                         | 220.87 ± 8.96                        | 314.86 ± 11.76                         | 331.42 ± 19.78                         |
| -13 h                             | 138.36 ± 7.08                         | 135.08 ± 5.78                        | 318.76 ± 14.41                         | 317.94 ± 15.66                         |
| -24 h                             | 129.33 ± 7.28                         | 129.15 ± 4.69                        | 209.42 ± 12.29                         | 146.22 ± 33.65                         |
| <i>L. vaginalis</i> BC17-CFS -7 h | 371.81 ± 15.91                        | 413.56 ± 15.44                       | 518.34 ± 20.80                         | 524.37 ± 22.99                         |
| -13 h                             | 270.15 ± 13.96                        | 345.95 ± 19.35                       | 421.21 ± 15.90                         | 424.89 ± 16.38                         |
| -24 h                             | 244.48 ± 11.40                        | 247.90 ± 9.51                        | 322.49 ± 12.07                         | 234.73 ± 11.66                         |
| <i>L. plantarum</i> BC18-CFS -7 h | 126.86 ± 8.09                         | 133.56 ± 6.26                        | 163.03 ± 7.24                          | 159.93 ± 12.53                         |
| -13 h                             | 107.46 ± 7.14                         | 114.56 ± 4.21                        | 129.37 ± 6.29                          | 125.10 ± 4.82                          |
| -24 h                             | 86.97 ± 5.90                          | 88.47 ± 4.59                         | 88.58 ± 4.29                           | 85.34 ± 4.46                           |
| <i>L. plantarum</i> BC19-CFS -7 h | 126.23 ± 7.74                         | 133.59 ± 5.30                        | 163.67 ± 8.52                          | 161.65 ± 7.12                          |
| -13 h                             | 107.48 ± 6.20                         | 111.98 ± 4.37                        | 130.21 ± 6.34                          | 123.67 ± 6.57                          |
| -24 h                             | 93.19 ± 3.72                          | 90.16 ± 3.64                         | 84.52 ± 3.51                           | 87.08 ± 4.77                           |
|                                   | <b><i>B. bifidum</i><br/>DSM20215</b> | <b><i>B. longum</i><br/>DSM20219</b> | <b><i>B. infantis</i><br/>DSM20088</b> | <b><i>B. infantis</i><br/>DSM20090</b> |
| <i>L. crispatus</i> BC1-CFS -7 h  | 170.53 ± 6.61                         | 149.39 ± 8.76                        | 150.19 ± 8.06                          | 158.07 ± 9.72                          |
| -13 h                             | 122.76 ± 4.82                         | 127.46 ± 9.48                        | 120.60 ± 7.14                          | 121.90 ± 6.51                          |
| -24 h                             | 82.38 ± 3.15                          | 88.78 ± 3.72                         | 75.39 ± 6.21                           | 76.75 ± 6.42                           |
| <i>L. crispatus</i> BC3-CFS -7 h  | 177.50 ± 7.33                         | 149.43 ± 7.03                        | 147.85 ± 5.45                          | 160.75 ± 8.42                          |
| -13 h                             | 130.08 ± 8.57                         | 132.98 ± 15.26                       | 119.76 ± 4.91                          | 121.46 ± 7.61                          |
| -24 h                             | 73.14 ± 7.05                          | 89.90 ± 4.89                         | 69.13 ± 5.44                           | 68.73 ± 7.08                           |
| <i>L. crispatus</i> BC4-CFS -7 h  | 176.66 ± 7.22                         | 161.53 ± 6.91                        | 142.23 ± 6.93                          | 161.43 ± 7.13                          |
| -13 h                             | 132.67 ± 5.08                         | 128.67 ± 5.16                        | 113.66 ± 4.72                          | 119.34 ± 6.01                          |
| -24 h                             | 72.32 ± 9.47                          | 90.44 ± 5.51                         | 78.76 ± 3.63                           | 77.16 ± 6.56                           |
| <i>L. crispatus</i> BC5-CFS -7 h  | 172.90 ± 6.14                         | 149.33 ± 5.56                        | 150.65 ± 6.88                          | 168.65 ± 8.36                          |
| -13 h                             | 121.28 ± 4.44                         | 123.30 ± 5.87                        | 118.86 ± 5.36                          | 119.64 ± 7.55                          |
| -24 h                             | 94.92 ± 4.75                          | 85.62 ± 6.00                         | 73.07 ± 5.32                           | 69.31 ± 5.88                           |
| <i>L. crispatus</i> BC6-CFS -7 h  | 177.06 ± 7.86                         | 170.41 ± 8.58                        | 145.31 ± 6.29                          | 149.81 ± 9.05                          |
| -13 h                             | 139.25 ± 10.43                        | 136.55 ± 10.33                       | 116.42 ± 6.86                          | 103.06 ± 3.86                          |
| -24 h                             | 79.24 ± 3.94                          | 99.06 ± 4.01                         | 78.61 ± 6.44                           | 72.45 ± 3.09                           |
| <i>L. crispatus</i> BC7-CFS -7 h  | 182.16 ± 7.39                         | 168.35 ± 8.09                        | 142.77 ± 7.17                          | 140.57 ± 16.14                         |
| -13 h                             | 139.19 ± 8.48                         | 136.87 ± 8.61                        | 118.98 ± 8.35                          | 102.76 ± 3.92                          |
| -24 h                             | 79.43 ± 6.11                          | 93.58 ± 7.92                         | 77.32 ± 4.81                           | 73.02 ± 2.74                           |
| <i>L. gasseri</i> BC8-CFS -7 h    | 198.84 ± 7.13                         | 191.44 ± 8.70                        | 181.92 ± 7.49                          | 207.82 ± 8.54                          |
| -13 h                             | 160.85 ± 6.83                         | 151.47 ± 7.21                        | 130.59 ± 7.65                          | 133.34 ± 13.99                         |
| -24 h                             | 106.12 ± 6.10                         | 119.18 ± 4.61                        | 105.98 ± 9.31                          | 106.24 ± 7.86                          |
| <i>L. gasseri</i> BC9-CFS -7 h    | 202.58 ± 8.36                         | 184.94 ± 9.88                        | 178.13 ± 17.97                         | 183.83 ± 18.30                         |
| -13 h                             | 162.83 ± 8.70                         | 161.33 ± 9.40                        | 128.48 ± 9.72                          | 129.74 ± 7.35                          |
| -24 h                             | 101.32 ± 5.26                         | 104.92 ± 6.02                        | 89.58 ± 8.02                           | 86.80 ± 6.63                           |
| <i>L. gasseri</i> BC10-CFS -7 h   | 202.90 ± 8.58                         | 195.02 ± 10.23                       | 171.95 ± 7.71                          | 189.48 ± 9.86                          |
| -13 h                             | 160.43 ± 6.57                         | 163.77 ± 7.78                        | 130.98 ± 7.66                          | 131.93 ± 10.19                         |
| -24 h                             | 103.80 ± 5.09                         | 106.58 ± 3.91                        | 92.26 ± 5.10                           | 89.74 ± 4.56                           |
| <i>L. gasseri</i> BC11-CFS -7 h   | 261.29 ± 20.79                        | 213.78 ± 16.16                       | 195.58 ± 8.96                          | 186.99 ± 18.30                         |
| -13 h                             | 182.53 ± 12.77                        | 176.93 ± 13.74                       | 139.79 ± 7.79                          | 133.71 ± 6.54                          |
| -24 h                             | 123.46 ± 10.72                        | 127.59 ± 7.94                        | 113.70 ± 13.51                         | 111.48 ± 11.97                         |

|                                   |                                            |                                            |                                         |                                 |
|-----------------------------------|--------------------------------------------|--------------------------------------------|-----------------------------------------|---------------------------------|
| <i>L. gasseri</i> BC12-CFS -7 h   | 199.96 ± 7.46                              | 193.44 ± 13.10                             | 167.57 ± 14.61                          | 166.65 ± 13.65                  |
| -13 h                             | 162.39 ± 7.29                              | 160.25 ± 7.12                              | 137.44 ± 18.66                          | 140.23 ± 23.22                  |
| -24 h                             | 102.72 ± 5.96                              | 105.06 ± 5.36                              | 92.80 ± 10.67                           | 92.72 ± 13.00                   |
| <i>L. gasseri</i> BC13-CFS -7 h   | 199.28 ± 17.02                             | 200.46 ± 16.70                             | 159.93 ± 11.51                          | 193.24 ± 22.53                  |
| -13 h                             | 152.71 ± 11.73                             | 138.29 ± 13.56                             | 135.14 ± 13.97                          | 136.37 ± 19.39                  |
| -24 h                             | 101.20 ± 5.97                              | 101.28 ± 4.04                              | 83.00 ± 3.48                            | 82.48 ± 3.25                    |
| <i>L. gasseri</i> BC14-CFS -7 h   | 182.07 ± 13.79                             | 187.84 ± 8.35                              | 176.93 ± 12.08                          | 171.08 ± 9.31                   |
| -13 h                             | 168.37 ± 11.66                             | 161.27 ± 6.04                              | 143.33 ± 14.21                          | 133.59 ± 5.20                   |
| -24 h                             | 103.62 ± 4.45                              | 96.14 ± 4.66                               | 94.52 ± 7.88                            | 97.08 ± 8.48                    |
| <i>L. vaginalis</i> BC16-CFS -7 h | 336.59 ± 19.76                             | 315.58 ± 17.78                             | 239.79 ± 13.30                          | 306.32 ± 14.40                  |
| -13 h                             | 222.18 ± 8.85                              | 199.90 ± 16.27                             | 151.63 ± 7.76                           | 204.02 ± 27.86                  |
| -24 h                             | 155.87 ± 9.50                              | 189.08 ± 16.09                             | 113.04 ± 4.78                           | 114.62 ± 5.26                   |
| <i>L. vaginalis</i> BC17-CFS -7 h | 488.92 ± 24.73                             | 412.04 ± 20.28                             | 335.90 ± 19.73                          | 419.25 ± 18.04                  |
| -13 h                             | 369.92 ± 20.15                             | 366.91 ± 14.85                             | 269.17 ± 24.18                          | 258.47 ± 14.45                  |
| -24 h                             | 285.75 ± 22.92                             | 295.12 ± 12.54                             | 118.86 ± 9.66                           | 139.43 ± 9.97                   |
| <i>L. plantarum</i> BC18-CFS -7 h | 151.75 ± 10.60                             | 153.99 ± 12.53                             | 139.87 ± 7.72                           | 148.55 ± 10.06                  |
| -13 h                             | 114.14 ± 4.66                              | 114.40 ± 6.57                              | 115.40 ± 5.86                           | 107.68 ± 6.68                   |
| -24 h                             | 83.00 ± 3.63                               | 79.42 ± 7.22                               | 73.79 ± 11.88                           | 81.75 ± 10.84                   |
| <i>L. plantarum</i> BC19-CFS -7 h | 156.79 ± 6.60                              | 148.35 ± 5.55                              | 143.93 ± 13.97                          | 158.93 ± 13.93                  |
| -13 h                             | 123.46 ± 5.32                              | 125.66 ± 8.44                              | 118.62 ± 8.07                           | 116.82 ± 10.44                  |
| -24 h                             | 81.68 ± 3.03                               | 85.04 ± 3.93                               | 72.13 ± 4.44                            | 68.89 ± 3.25                    |
|                                   | <b><i>B. adolescentis</i><br/>DSM20083</b> | <b><i>B. adolescentis</i><br/>DSM20086</b> | <b><i>B. angulatum</i><br/>DSM20098</b> | <b><i>E. coli</i><br/>SO107</b> |
| <i>L. crispatus</i> BC1-CFS -7 h  | 150.81 ± 10.19                             | 135.83 ± 11.80                             | 185.96 ± 10.14                          | 100.60 ± 4.00                   |
| -13 h                             | 122.64 ± 6.19                              | 113.94 ± 5.58                              | 157.13 ± 9.76                           | 84.60 ± 3.24                    |
| -24 h                             | 92.10 ± 6.03                               | 78.92 ± 5.56                               | 94.18 ± 4.06                            | 53.31 ± 2.70                    |
| <i>L. crispatus</i> BC3-CFS -7 h  | 162.91 ± 12.51                             | 146.79 ± 11.97                             | 180.80 ± 13.63                          | 101.50 ± 3.79                   |
| -13 h                             | 126.24 ± 9.29                              | 120.08 ± 8.63                              | 148.11 ± 10.72                          | 83.60 ± 3.21                    |
| -24 h                             | 88.42 ± 4.07                               | 78.57 ± 5.76                               | 95.08 ± 4.56                            | 61.61 ± 2.51                    |
| <i>L. crispatus</i> BC4-CFS -7 h  | 163.75 ± 7.57                              | 146.41 ± 7.44                              | 189.28 ± 7.17                           | 98.68 ± 6.26                    |
| -13 h                             | 127.31 ± 5.28                              | 113.68 ± 4.34                              | 147.79 ± 6.42                           | 88.78 ± 7.74                    |
| -24 h                             | 89.08 ± 4.47                               | 76.24 ± 4.27                               | 94.06 ± 4.00                            | 52.41 ± 4.39                    |
| <i>L. crispatus</i> BC5-CFS -7 h  | 158.65 ± 10.49                             | 149.99 ± 14.38                             | 177.98 ± 8.23                           | 98.94 ± 3.72                    |
| -13 h                             | 125.80 ± 11.17                             | 115.60 ± 5.34                              | 156.85 ± 5.86                           | 83.82 ± 4.69                    |
| -24 h                             | 86.74 ± 3.34                               | 90.36 ± 3.37                               | 93.70 ± 5.41                            | 53.83 ± 3.19                    |
| <i>L. crispatus</i> BC6-CFS -7 h  | 159.59 ± 12.03                             | 144.19 ± 8.90                              | 194.58 ± 12.27                          | 97.12 ± 3.68                    |
| -13 h                             | 125.43 ± 5.27                              | 106.12 ± 8.67                              | 173.13 ± 16.01                          | 91.48 ± 4.21                    |
| -24 h                             | 86.26 ± 4.41                               | 82.48 ± 3.35                               | 94.00 ± 3.98                            | 50.41 ± 1.91                    |
| <i>L. crispatus</i> BC7-CFS -7 h  | 164.55 ± 6.94                              | 140.07 ± 10.39                             | 182.44 ± 9.75                           | 102.64 ± 3.89                   |
| -13 h                             | 126.27 ± 6.65                              | 101.10 ± 3.78                              | 153.19 ± 9.27                           | 91.78 ± 4.06                    |
| -24 h                             | 85.12 ± 3.74                               | 83.20 ± 3.49                               | 90.96 ± 5.66                            | 72.81 ± 3.28                    |
| <i>L. gasseri</i> BC8-CFS -7 h    | 195.94 ± 11.39                             | 188.20 ± 11.71                             | 205.86 ± 8.18                           | 99.94 ± 4.22                    |
| -13 h                             | 153.83 ± 12.87                             | 126.26 ± 8.16                              | 172.81 ± 7.43                           | 97.86 ± 4.89                    |
| -24 h                             | 120.54 ± 5.37                              | 110.64 ± 7.59                              | 111.88 ± 6.36                           | 86.10 ± 4.16                    |

|                                          |                |                |                |               |
|------------------------------------------|----------------|----------------|----------------|---------------|
| <b><i>L. gasseri</i> BC9-CFS -7 h</b>    | 183.84 ± 10.81 | 150.42 ± 5.71  | 210.38 ± 10.76 | 95.78 ± 4.25  |
| -13 h                                    | 151.35 ± 6.19  | 127.75 ± 9.81  | 171.62 ± 10.76 | 97.04 ± 5.34  |
| -24 h                                    | 104.34 ± 4.71  | 104.02 ± 5.03  | 109.50 ± 6.93  | 77.80 ± 3.00  |
| <b><i>L. gasseri</i> BC10-CFS -7 h</b>   | 194.32 ± 8.17  | 158.33 ± 10.80 | 197.36 ± 19.13 | 101.12 ± 3.77 |
| -13 h                                    | 161.09 ± 7.32  | 129.44 ± 8.42  | 168.30 ± 11.05 | 90.02 ± 4.84  |
| -24 h                                    | 108.82 ± 5.62  | 103.40 ± 3.86  | 108.16 ± 7.05  | 71.89 ± 8.08  |
| <b><i>L. gasseri</i> BC11-CFS -7 h</b>   | 204.54 ± 7.79  | 176.87 ± 12.13 | 251.29 ± 16.83 | 104.08 ± 4.26 |
| -13 h                                    | 170.69 ± 9.50  | 136.47 ± 12.15 | 195.02 ± 9.55  | 96.42 ± 4.73  |
| -24 h                                    | 127.09 ± 7.79  | 126.80 ± 6.64  | 133.83 ± 8.12  | 82.46 ± 4.59  |
| <b><i>L. gasseri</i> BC12-CFS -7 h</b>   | 186.78 ± 7.17  | 150.70 ± 6.89  | 208.02 ± 9.14  | 101.04 ± 4.33 |
| -13 h                                    | 147.59 ± 12.66 | 121.54 ± 4.53  | 179.76 ± 6.92  | 98.44 ± 9.08  |
| -24 h                                    | 99.08 ± 9.76   | 96.24 ± 8.14   | 112.44 ± 4.18  | 71.61 ± 3.88  |
| <b><i>L. gasseri</i> BC13-CFS -7 h</b>   | 190.28 ± 7.30  | 159.07 ± 22.24 | 237.42 ± 18.24 | 99.22 ± 4.26  |
| -13 h                                    | 136.85 ± 13.17 | 135.38 ± 20.34 | 184.80 ± 11.63 | 92.30 ± 3.45  |
| -24 h                                    | 97.36 ± 3.63   | 101.72 ± 3.99  | 104.38 ± 3.93  | 71.27 ± 4.76  |
| <b><i>L. gasseri</i> BC14-CFS -7 h</b>   | 189.16 ± 9.72  | 170.01 ± 8.01  | 176.54 ± 13.98 | 97.88 ± 3.69  |
| -13 h                                    | 155.53 ± 6.66  | 138.87 ± 10.25 | 160.41 ± 16.10 | 93.60 ± 4.46  |
| -24 h                                    | 94.55 ± 4.82   | 100.36 ± 10.44 | 103.94 ± 3.92  | 72.99 ± 2.73  |
| <b><i>L. vaginalis</i> BC16-CFS -7 h</b> | 295.88 ± 16.00 | 233.76 ± 20.42 | 327.03 ± 13.01 | 101.76 ± 3.79 |
| -13 h                                    | 212.18 ± 23.46 | 152.53 ± 28.00 | 274.14 ± 65.85 | 102.04 ± 4.81 |
| -24 h                                    | 192.44 ± 11.84 | 137.73 ± 19.88 | 200.46 ± 10.41 | 85.76 ± 4.04  |
| <b><i>L. vaginalis</i> BC17-CFS -7 h</b> | 460.37 ± 26.06 | 405.82 ± 17.68 | 512.04 ± 19.17 | 105.84 ± 4.30 |
| -13 h                                    | 331.50 ± 16.31 | 340.66 ± 32.20 | 434.19 ± 27.86 | 101.92 ± 4.30 |
| -24 h                                    | 218.55 ± 13.23 | 245.75 ± 20.32 | 328.68 ± 25.14 | 91.34 ± 4.43  |
| <b><i>L. plantarum</i> BC18-CFS -7 h</b> | 143.04 ± 9.35  | 142.59 ± 16.34 | 172.69 ± 6.86  | 101.32 ± 4.60 |
| -13 h                                    | 109.55 ± 7.19  | 112.50 ± 6.27  | 140.61 ± 8.73  | 91.60 ± 3.41  |
| -24 h                                    | 79.01 ± 8.30   | 88.66 ± 4.21   | 86.50 ± 5.41   | 71.05 ± 3.11  |
| <b><i>L. plantarum</i> BC19-CFS -7 h</b> | 158.11 ± 10.89 | 142.71 ± 17.53 | 176.02 ± 7.17  | 99.66 ± 4.44  |
| -13 h                                    | 116.08 ± 6.27  | 107.42 ± 5.51  | 130.49 ± 9.69  | 89.10 ± 3.69  |
| -24 h                                    | 81.46 ± 3.04   | 87.76 ± 6.16   | 83.44 ± 3.61   | 72.01 ± 2.72  |



**Table S2** Effects of *Enterococcus/Staphylococcus* CFSs on bifidobacteria/*E. coli* SO107 growth. The growth of bifidobacteria/*E. coli* SO107 in the presence of CFSs is reported in percentage with respect to control (100%) as mean  $\pm$  SD of data acquired from one batch of CFSs ( $n = 3$ ).

|                                      | <i>B. breve</i><br>DSM20091        | <i>B. breve</i><br>DSM20456        | <i>B. bifidum</i><br>DSM20082   | <i>B. bifidum</i><br>DSM20213  |
|--------------------------------------|------------------------------------|------------------------------------|---------------------------------|--------------------------------|
| <i>E. faecalis</i> BC101-CFS- 7 h    | 98.54 $\pm$ 2.56                   | 97.21 $\pm$ 4.25                   | 98.54 $\pm$ 5.21                | 97.44 $\pm$ 3.78               |
| -13 h                                | 94.5 $\pm$ 4.78                    | 95.41 $\pm$ 5.78                   | 93.22 $\pm$ 6.23                | 92.41 $\pm$ 4.56               |
| -24 h                                | 90.21 $\pm$ 3.25                   | 91.24 $\pm$ 6.12                   | 90.23 $\pm$ 5.14                | 89.43 $\pm$ 2.28               |
| <i>E. faecium</i> BC105-CFS- 7 h     | 96.54 $\pm$ 3.67                   | 97.42 $\pm$ 3.78                   | 100.01 $\pm$ 4.56               | 97.62 $\pm$ 3.36               |
| -13 h                                | 93.41 $\pm$ 3.51                   | 94.14 $\pm$ 4.56                   | 92.32 $\pm$ 3.98                | 91.51 $\pm$ 4.14               |
| -24 h                                | 89.43 $\pm$ 4.71                   | 90.73 $\pm$ 2.23                   | 88.52 $\pm$ 3.78                | 87.94 $\pm$ 5.21               |
| <i>S. aureus</i> SO105- CFS- 7 h     | 95.41 $\pm$ 5.36                   | 95.62 $\pm$ 3.46                   | 94.83 $\pm$ 4.56                | 96.52 $\pm$ 7.12               |
| -13 h                                | 90.4 $\pm$ 4.78                    | 91.21 $\pm$ 2.56                   | 90.74 $\pm$ 6.21                | 91.54 $\pm$ 3.38               |
| -24 h                                | 86.51 $\pm$ 6.32                   | 87.54 $\pm$ 4.78                   | 86.51 $\pm$ 4.12                | 87.81 $\pm$ 4.45               |
| <i>S. epidermidis</i> SO106-CFS- 7 h | 97.52 $\pm$ 4.91                   | 96.53 $\pm$ 6.13                   | 96.51 $\pm$ 3.36                | 97.82 $\pm$ 5.47               |
| -13 h                                | 91.41 $\pm$ 5.12                   | 89.51 $\pm$ 2.25                   | 88.55 $\pm$ 3.95                | 91.52 $\pm$ 3.78               |
| -24 h                                | 86.34 $\pm$ 3.26                   | 85.14 $\pm$ 3.36                   | 86.42 $\pm$ 4.05                | 89.55 $\pm$ 4.12               |
|                                      | <i>B. bifidum</i><br>DSM20215      | <i>B. longum</i><br>DSM20219       | <i>B. infantis</i><br>DSM20088  | <i>B. infantis</i><br>DSM20090 |
| <i>E. faecalis</i> BC101-CFS- 7 h    | 100.02 $\pm$ 6.21                  | 100.04 $\pm$ 7.12                  | 99.52 $\pm$ 8.13                | 96.52 $\pm$ 3.89               |
| -13 h                                | 94.54 $\pm$ 2.39                   | 95.52 $\pm$ 4.52                   | 92.21 $\pm$ 2.28                | 93.44 $\pm$ 7.05               |
| -24 h                                | 91.53 $\pm$ 5.17                   | 91.43 $\pm$ 3.84                   | 89.12 $\pm$ 3.45                | 89.53 $\pm$ 3.99               |
| <i>E. faecium</i> BC105-CFS- 7 h     | 97.55 $\pm$ 3.23                   | 100.04 $\pm$ 4.45                  | 97.44 $\pm$ 5.24                | 98.32 $\pm$ 6.2                |
| -13 h                                | 95.61 $\pm$ 5.62                   | 92.31 $\pm$ 6.32                   | 91.12 $\pm$ 3.38                | 92.33 $\pm$ 4.71               |
| -24 h                                | 92.05 $\pm$ 6.32                   | 89.72 $\pm$ 4.65                   | 87.53 $\pm$ 4.56                | 88.71 $\pm$ 6.64               |
| <i>S. aureus</i> SO105- CFS- 7 h     | 94.32 $\pm$ 2.48                   | 95.63 $\pm$ 5.27                   | 96.52 $\pm$ 6.78                | 97.84 $\pm$ 2.56               |
| -13 h                                | 89.54 $\pm$ 3.35                   | 91.44 $\pm$ 5.84                   | 92.51 $\pm$ 6.54                | 94.53 $\pm$ 3.32               |
| -24 h                                | 85.42 $\pm$ 4.23                   | 87.65 $\pm$ 4.16                   | 88.93 $\pm$ 3.84                | 91.51 $\pm$ 5.93               |
| <i>S. epidermidis</i> SO106-CFS- 7 h | 93.61 $\pm$ 6.32                   | 94.62 $\pm$ 5.32                   | 95.82 $\pm$ 3.33                | 98.74 $\pm$ 4.75               |
| -13 h                                | 90.63 $\pm$ 7.14                   | 91.64 $\pm$ 3.89                   | 92.42 $\pm$ 5.26                | 93.64 $\pm$ 2.29               |
| -24 h                                | 88.62 $\pm$ 2.56                   | 87.44 $\pm$ 2.37                   | 88.45 $\pm$ 6.18                | 92.53 $\pm$ 3.84               |
|                                      | <i>B. adolescentis</i><br>DSM20083 | <i>B. adolescentis</i><br>DSM20086 | <i>B. angulatum</i><br>DSM20098 | <i>E. coli</i><br>SO107        |
| <i>E. faecalis</i> BC101-CFS- 7 h    | 98.32 $\pm$ 3.79                   | 97.84 $\pm$ 4.36                   | 99.18 $\pm$ 6.28                | 97.77 $\pm$ 6.32               |
| -13 h                                | 92.41 $\pm$ 5.23                   | 91.45 $\pm$ 3.34                   | 94.46 $\pm$ 6.21                | 96.51 $\pm$ 4.71               |
| -24 h                                | 88.91 $\pm$ 4.25                   | 88.92 $\pm$ 4.57                   | 91.49 $\pm$ 4.78                | 94.93 $\pm$ 4.59               |
| <i>E. faecium</i> BC105-CFS- 7 h     | 95.43 $\pm$ 3.37                   | 97.84 $\pm$ 5.68                   | 99.51 $\pm$ 3.38                | 98.79 $\pm$ 5.89               |
| -13 h                                | 91.84 $\pm$ 4.65                   | 90.11 $\pm$ 4.32                   | 93.37 $\pm$ 6.51                | 96.41 $\pm$ 4.39               |
| -24 h                                | 87.52 $\pm$ 2.32                   | 88.64 $\pm$ 2.33                   | 91.39 $\pm$ 3.12                | 93.66 $\pm$ 5.27               |
| <i>S. aureus</i> SO105- CFS- 7 h     | 98.72 $\pm$ 4.39                   | 96.47 $\pm$ 4.17                   | 97.81 $\pm$ 4.18                | 99.76 $\pm$ 7.13               |
| -13 h                                | 90.51 $\pm$ 6.21                   | 91.19 $\pm$ 3.27                   | 89.52 $\pm$ 5.13                | 97.37 $\pm$ 3.98               |
| -24 h                                | 85.63 $\pm$ 3.74                   | 87.09 $\pm$ 4.32                   | 85.58 $\pm$ 4.56                | 95.52 $\pm$ 4.59               |
| <i>S. epidermidis</i> SO106-CFS- 7 h | 94.54 $\pm$ 5.52                   | 95.61 $\pm$ 5.41                   | 98.67 $\pm$ 5.23                | 98.73 $\pm$ 3.56               |
| -13 h                                | 89.62 $\pm$ 3.99                   | 90.11 $\pm$ 5.02                   | 88.69 $\pm$ 6.21                | 96.47 $\pm$ 3.27               |
| -24 h                                | 85.12 $\pm$ 5.31                   | 85.58 $\pm$ 2.39                   | 86.28 $\pm$ 5.56                | 94.28 $\pm$ 4.78               |

**Table S3** Effects of lactobacilli CFSs on *Bifidobacterium* spp. biofilms. The formation of bifidobacteria/*E. coli* SO107 biofilms in the presence of BC8-BC11-BC17 CFSs-7 h, CFSs-13 h and CFS-24 h is reported in percentage with respect to control (100%) as mean  $\pm$  SD of data acquired from one batch of CFSs ( $n = 3$ ).

|                                   | <i>B. breve</i><br>DSM20091        | <i>B. breve</i><br>DSM20456        | <i>B. bifidum</i><br>DSM20082   | <i>B. bifidum</i><br>DSM20213  |
|-----------------------------------|------------------------------------|------------------------------------|---------------------------------|--------------------------------|
| <i>L. crispatus</i> BC8-CFS -7 h  | 190.52 $\pm$ 4.56                  | 220.34 $\pm$ 10.21                 | 180.38 $\pm$ 6.78               | 223.28 $\pm$ 23.6              |
| -13 h                             | 158.89 $\pm$ 6.21                  | 187.35 $\pm$ 9.45                  | 157.94 $\pm$ 4.56               | 190.12 $\pm$ 8.95              |
| -24 h                             | 103.43 $\pm$ 3.47                  | 145.61 $\pm$ 7.23                  | 102.63 $\pm$ 6.25               | 139.46 $\pm$ 6.32              |
| <i>L. gasseri</i> BC11-CFS -7 h   | 212.32 $\pm$ 7.45                  | 247.79 $\pm$ 9.64                  | 209.52 $\pm$ 9.36               | 267.82 $\pm$ 8.91              |
| -13 h                             | 171.44 $\pm$ 8.12                  | 215.58 $\pm$ 11.32                 | 170.44 $\pm$ 7.45               | 231.33 $\pm$ 10.35             |
| -24 h                             | 124.51 $\pm$ 6.98                  | 155.87 $\pm$ 8.74                  | 123.59 $\pm$ 4.65               | 156.62 $\pm$ 6.98              |
| <i>L. vaginalis</i> BC17-CFS -7 h | 396.79 $\pm$ 11.25                 | 326.91 $\pm$ 9.36                  | 308.54 $\pm$ 10.87              | 355.72 $\pm$ 12.54             |
| -13 h                             | 313.58 $\pm$ 9.78                  | 298.28 $\pm$ 10.14                 | 214.32 $\pm$ 11.34              | 289.78 $\pm$ 13.24             |
| -24 h                             | 162.12 $\pm$ 6.52                  | 189.29 $\pm$ 9.21                  | 144.91 $\pm$ 7.12               | 201.23 $\pm$ 10.84             |
|                                   | <i>B. bifidum</i><br>DSM20215      | <i>B. longum</i><br>DSM20219       | <i>B. infantis</i><br>DSM20088  | <i>B. infantis</i><br>DSM20090 |
| <i>L. crispatus</i> BC8-CFS -7 h  | 231.31 $\pm$ 9.78                  | 168.88 $\pm$ 8.23                  | 158.92 $\pm$ 3.36               | 210.04 $\pm$ 10.84             |
| -13 h                             | 195.32 $\pm$ 8.54                  | 142.62 $\pm$ 7.54                  | 132.58 $\pm$ 4.56               | 121.34 $\pm$ 6.65              |
| -24 h                             | 150.19 $\pm$ 6.32                  | 99.52 $\pm$ 6.98                   | 97.52 $\pm$ 3.58                | 98.48 $\pm$ 4.32               |
| <i>L. gasseri</i> BC11-CFS -7 h   | 252.28 $\pm$ 11.24                 | 184.54 $\pm$ 8.94                  | 169.82 $\pm$ 7.65               | 250.12 $\pm$ 11.48             |
| -13 h                             | 225.27 $\pm$ 12.28                 | 158.28 $\pm$ 5.28                  | 145.75 $\pm$ 6.42               | 136.88 $\pm$ 6.65              |
| -24 h                             | 165.47 $\pm$ 8.98                  | 125.57 $\pm$ 7.29                  | 113.16 $\pm$ 6.94               | 112.47 $\pm$ 8.32              |
| <i>L. vaginalis</i> BC17-CFS -7 h | 318.77 $\pm$ 13.41                 | 352.04 $\pm$ 11.32                 | 232.92 $\pm$ 9.45               | 285.58 $\pm$ 12.34             |
| -13 h                             | 280.18 $\pm$ 11.47                 | 225.64 $\pm$ 10.89                 | 171.31 $\pm$ 8.36               | 156.03 $\pm$ 6.98              |
| -24 h                             | 215.49 $\pm$ 9.84                  | 130.51 $\pm$ 8.54                  | 125.74 $\pm$ 4.75               | 152.02 $\pm$ 5.65              |
|                                   | <i>B. adolescentis</i><br>DSM20083 | <i>B. adolescentis</i><br>DSM20086 | <i>B. angulatum</i><br>DSM20098 | <i>E. coli</i><br>SO107        |
| <i>L. crispatus</i> BC8-CFS -7 h  | 230.61 $\pm$ 10.84                 | 182.47 $\pm$ 7.21                  | 220.14 $\pm$ 11.79              | 101.36 $\pm$ 6.21              |
| -13 h                             | 142.34 $\pm$ 6.74                  | 161.29 $\pm$ 5.65                  | 132.55 $\pm$ 5.45               | 95.39 $\pm$ 5.66               |
| -24 h                             | 128.46 $\pm$ 2.34                  | 105.56 $\pm$ 9.12                  | 118.33 $\pm$ 6.32               | 94.12 $\pm$ 4.57               |
| <i>L. gasseri</i> BC11-CFS -7 h   | 270.42 $\pm$ 7.98                  | 214.57 $\pm$ 7.48                  | 259.29 $\pm$ 12.32              | 102.34 $\pm$ 2.23              |
| -13 h                             | 159.13 $\pm$ 4.36                  | 175.76 $\pm$ 5.46                  | 148.87 $\pm$ 6.33               | 99.09 $\pm$ 4.68               |
| -24 h                             | 132.39 $\pm$ 3.56                  | 126.87 $\pm$ 3.77                  | 124.51 $\pm$ 4.56               | 99.91 $\pm$ 8.99               |
| <i>L. vaginalis</i> BC17-CFS -7 h | 388.91 $\pm$ 8.99                  | 300.04 $\pm$ 9.08                  | 360.91 $\pm$ 7.89               | 101.47 $\pm$ 9.21              |
| -13 h                             | 321.54 $\pm$ 4.65                  | 232.91 $\pm$ 10.17                 | 300.34 $\pm$ 13.32              | 100.22 $\pm$ 4.56              |
| -24 h                             | 215.61 $\pm$ 11.32                 | 143.53 $\pm$ 6.34                  | 162.72 $\pm$ 5.45               | 98.18 $\pm$ 7.28               |

**Table S4 Concentrations of metabolites identified in *L. vaginalis* BC17-CFS-7 h, BC17-CFS-13 h and BC17-CFS-24 h by means of <sup>1</sup>H-NMR.** Concentrations are calculated as differences from MRS broth (mmol/L).

|                        | <b>BC17-CFS-7 h</b> | <b>BC17-CFS-13 h</b> | <b>BC17-CFS-24 h</b> |
|------------------------|---------------------|----------------------|----------------------|
| Acetate                | -0.08385            | 1.890963             | 3.462663             |
| Acetone                | 0.003683            | 0.012908             | -0.04407             |
| Alanine                | 0.547327            | 0.583526             | 0.658338             |
| 4-Aminobutyrate        | -7.917620           | -7.699690            | -7.705340            |
| Ascorbate              | -0.016450           | -0.073410            | -0.151510            |
| Asparagine             | 0.079621            | 0.121927             | 0.139162             |
| Aspartate              | 0.069302            | 0.076849             | 0.140977             |
| 2,3-Butanediol         | 0.140458            | 0.297788             | 0.333282             |
| Carnitine              | 0.005071            | -0.00128             | -0.00976             |
| Choline                | -0.078930           | 0.010291             | 0.017831             |
| Creatine               | -0.01178            | -0.04201             | -0.06848             |
| Creatinine             | 0.027159            | 0.040846             | 0.015137             |
| Cysteine               | 0.244673            | 0.114412             | 0.142582             |
| Cytidine               | 0.001450            | 0.007524             | 0                    |
| 1,3-Dihydroxyacetone   | 0.0127420           | 0.015433             | 0.043588             |
| Ethanol                | 32.15973            | 89.99636             | 119.7147             |
| Formate                | 0.026622            | 0.166477             | 0.252582             |
| Fructose               | -1.522160           | -2.413920            | -2.498410            |
| Glucose                | -32.4321            | -81.8033             | -135.02              |
| Glutamate              | 2.574019            | 3.274563             | 4.404634             |
| Glycerol               | 0.386180            | 0.428580             | 0.698908             |
| Glycine                | 0.046360            | 0.094093             | 0.153861             |
| 2-Hydroxyisovalerate   | 0.014838            | -0.01615             | -0.04721             |
| 4-Hydroxyphenylacetate | 0.342421            | 0.050658             | 0.055779             |
| 4-Hydroxyphenyllactate | 0.069730            | 0.010706             | 1.645295             |
| Hypoxanthine           | -0.01044            | 0.025296             | 0.051736             |
| Inosine                | -0.004840           | 0                    | 0                    |
| Isobutyrate            | -0.012030           | -0.010950            | -0.014350            |
| Isoleucine             | 0.270583            | 0.332132             | 0.408987             |
| Lactate                | 0.672027            | 2.423465             | 14.0042              |
| Leucine                | 1.398733            | 1.217750             | 0.681371             |
| Lysine                 | 0.153855            | 0.196822             | 0.455287             |
| Maltose                | -0.468280           | -1.439140            | -1.439140            |
| Mannose                | -0.027060           | -0.130870            | -0.207690            |
| Methanol               | 0.032158            | 0.054368             | 0.042424             |
| Methionine             | 0.049827            | 0.053229             | 0.090273             |
| N-Acetylaspartate      | -0.004930           | 0.257167             | 0.654957             |
| Galactose              | -0.472420           | -0.472420            | -0.472420            |
| Glutamine              | 0.002855            | 0.211727             | 0.180485             |
| O-Acetylcholine        | -0.178320           | -0.479910            | -0.513260            |
| O-Phosphocholine       | 0.014631            | 0.036034             | 0.020396             |

|               |           |           |           |
|---------------|-----------|-----------|-----------|
| Ornithine     | 1.266772  | 1.123998  | 0.826663  |
| Phenylalanine | -0.073280 | -0.210870 | -0.244130 |
| Proline       | 0.070373  | 0.001167  | 0.054416  |
| Pyruvate      | -0.120170 | -0.122970 | -0.112390 |
| Ribose        | -0.127440 | -0.220100 | 0         |
| Succinate     | 0.073251  | 0.112591  | 0.253292  |
| Threonine     | -0.164560 | 0.027505  | 0.151545  |
| Thymine       | 0.021640  | 0.022490  | 0.020184  |
| Trehalose     | -0.120970 | 0.122650  | -0.097190 |
| Trigonelline  | 0.010096  | 0.002862  | -0.016050 |
| Tryptophan    | 0.064192  | 0.046386  | 0.009169  |
| Tyrosine      | 0.329040  | 0.293650  | 0.238328  |
| Uridine       | -0.001300 | 0.0270603 | -0.016440 |
| Valine        | 0.483745  | 0.565348  | 0.812885  |
